# Supplementary material
Source: PubMed Central journal article supplement (PMC7197406)
Supplement: NIHMS1582036-supplement-S7.pdf [file NIHMS1582036-supplement-S7.pdf]

**Table S6. Summary of four A-series dipole-interaction polarizable models in anisotropic polarizability calculations.**

| A-Series Models                                     |      | Set1  | Set2 | Set3  | Set4  | Set5  | Set6  | Set7 | Set8 | Set9  | Set10 | Set11 | Set12 | Set13 | All  |
|-----------------------------------------------------|------|-------|------|-------|-------|-------|-------|------|------|-------|-------|-------|-------|-------|------|
| #Data                                               |      | 595   | 665  | 107   | 38    | 444   | 28    | 85   | 606  | 105   | 1252  | 799   | 57    | 61    | 4842 |
| <b>Applequist (No 1-2, 1-3 Interactions)</b>        |      |       |      |       |       |       |       |      |      |       |       |       |       |       |      |
| <b>Diagonal Elements</b>                            | AUE  | 8.17  | 0.66 | 12.49 | 19.81 | 11.07 | 34.19 | 5.28 | 7.02 | 9.73  | 14.02 | 0.59  | 12.72 | 19.60 | 8.04 |
|                                                     | RMSE | 9.15  | 0.75 | 14.13 | 22.82 | 12.60 | 35.65 | 6.01 | 7.91 | 11.45 | 16.09 | 0.69  | 14.72 | 22.53 | 9.16 |
|                                                     | APE  | 10.64 | 2.81 | 18.88 | 18.39 | 8.16  | 17.33 | 7.32 | 5.07 | 4.35  | 14.38 | 2.67  | 25.89 | 26.72 | 8.76 |
| <b>All elements</b>                                 | AUE  | 4.53  | 0.42 | 7.35  | 11.47 | 8.76  | 20.39 | 3.50 | 6.04 | 7.85  | 8.03  | 0.39  | 6.87  | 10.60 | 5.13 |
|                                                     | RMSE | 6.65  | 0.58 | 10.29 | 16.51 | 11.23 | 26.87 | 4.65 | 7.19 | 10.05 | 11.75 | 0.53  | 10.51 | 16.09 | 7.09 |
| <b>Molecular Polarizability</b>                     | AUE  | 4.23  | 0.39 | 7.60  | 16.55 | 5.63  | 22.48 | 2.75 | 3.57 | 5.45  | 9.50  | 0.35  | 6.70  | 13.63 | 4.89 |
|                                                     | APE  | 4.89  | 1.20 | 10.81 | 15.96 | 4.06  | 10.17 | 3.68 | 2.48 | 2.41  | 9.13  | 1.15  | 11.95 | 17.46 | 4.90 |
| <b>MPAD</b>                                         | APE  | 11.12 | 3.28 | 19.54 | 22.13 | 9.16  | 16.23 | 7.89 | 5.59 | 5.01  | 16.30 | 3.15  | 25.60 | 29.78 | 9.72 |
| <b>Thole Exponential (No 1-2, 1-3 Interactions)</b> |      |       |      |       |       |       |       |      |      |       |       |       |       |       |      |
| <b>Diagonal</b>                                     | AUE  | 8.60  | 0.54 | 12.11 | 21.13 | 11.44 | 36.64 | 5.26 | 7.16 | 9.34  | 14.56 | 0.47  | 12.93 | 19.84 | 8.26 |
|                                                     | RMSE | 9.67  | 0.60 | 13.87 | 24.17 | 12.93 | 37.99 | 5.86 | 8.05 | 10.77 | 16.72 | 0.53  | 15.06 | 22.81 | 9.39 |
|                                                     | APE  | 11.19 | 2.39 | 17.96 | 19.78 | 8.39  | 18.65 | 7.23 | 5.17 | 4.12  | 14.97 | 2.25  | 26.09 | 26.90 | 8.88 |
| <b>All Elements</b>                                 | AUE  | 4.73  | 0.35 | 7.12  | 12.05 | 9.04  | 21.60 | 3.51 | 6.06 | 7.57  | 8.27  | 0.32  | 6.96  | 10.71 | 5.23 |
|                                                     | RMSE | 7.00  | 0.47 | 10.10 | 17.41 | 11.56 | 28.47 | 4.62 | 7.21 | 9.55  | 12.16 | 0.42  | 10.74 | 16.28 | 7.24 |
| <b>Molecular Polarizability</b>                     | AUE  | 4.44  | 0.39 | 7.10  | 17.75 | 5.70  | 23.89 | 2.35 | 3.32 | 4.36  | 9.81  | 0.35  | 6.58  | 13.77 | 4.95 |
|                                                     | APE  | 5.09  | 1.66 | 9.71  | 17.32 | 4.06  | 10.84 | 3.23 | 2.28 | 1.91  | 9.40  | 1.60  | 11.59 | 17.47 | 5.07 |
| <b>MPAD</b>                                         | APE  | 11.69 | 2.78 | 18.68 | 23.67 | 9.35  | 17.31 | 7.67 | 5.67 | 4.69  | 16.86 | 2.63  | 25.87 | 29.97 | 9.81 |
| <b>Thole Linear (No 1-2, 1-3 Interactions)</b>      |      |       |      |       |       |       |       |      |      |       |       |       |       |       |      |
| <b>Diagonal Elements</b>                            | AUE  | 8.22  | 0.44 | 12.02 | 20.83 | 11.18 | 35.59 | 5.20 | 7.01 | 9.77  | 14.12 | 0.37  | 12.76 | 19.67 | 8.02 |
|                                                     | RMSE | 9.20  | 0.49 | 13.70 | 23.88 | 12.71 | 37.01 | 5.78 | 7.90 | 11.54 | 16.22 | 0.41  | 14.80 | 22.60 | 9.13 |
|                                                     | APE  | 10.72 | 2.10 | 17.89 | 19.50 | 8.21  | 17.90 | 7.16 | 5.07 | 4.37  | 14.49 | 1.92  | 25.81 | 26.74 | 8.57 |
| <b>All Elements</b>                                 | AUE  | 4.55  | 0.30 | 7.04  | 11.86 | 8.82  | 21.06 | 3.45 | 6.04 | 7.88  | 8.06  | 0.27  | 6.88  | 10.63 | 5.11 |
|                                                     | RMSE | 6.69  | 0.41 | 9.96  | 17.20 | 11.32 | 27.80 | 4.54 | 7.19 | 10.10 | 11.82 | 0.36  | 10.57 | 16.14 | 7.07 |
| <b>Molecular Polarizability</b>                     | AUE  | 4.24  | 0.26 | 7.17  | 17.52 | 5.71  | 23.68 | 2.41 | 3.54 | 5.57  | 9.59  | 0.22  | 6.68  | 13.69 | 4.89 |
|                                                     | APE  | 4.91  | 1.05 | 9.85  | 17.13 | 4.09  | 10.72 | 3.30 | 2.47 | 2.46  | 9.23  | 0.97  | 11.82 | 17.48 | 4.86 |
| <b>MPAD</b>                                         | APE  | 11.18 | 2.39 | 18.55 | 23.42 | 9.21  | 16.84 | 7.60 | 5.58 | 5.04  | 16.41 | 2.20  | 25.59 | 29.81 | 9.47 |
| <b>Thole Amoeba (No 1-2, 1-3 Interactions)</b>      |      |       |      |       |       |       |       |      |      |       |       |       |       |       |      |
| <b>Diagonal Elements</b>                            | AUE  | 8.25  | 0.40 | 12.31 | 20.43 | 11.23 | 35.04 | 5.25 | 7.02 | 9.72  | 14.15 | 0.37  | 12.84 | 19.67 | 8.04 |
|                                                     | RMSE | 9.24  | 0.45 | 13.99 | 23.44 | 12.76 | 36.41 | 5.92 | 7.90 | 11.43 | 16.25 | 0.41  | 14.91 | 22.61 | 9.14 |
|                                                     | APE  | 10.74 | 2.24 | 18.43 | 19.12 | 8.25  | 17.78 | 7.27 | 5.07 | 4.34  | 14.53 | 2.11  | 26.07 | 26.81 | 8.65 |
| <b>All Elements</b>                                 | AUE  | 4.57  | 0.29 | 7.22  | 11.70 | 8.87  | 20.80 | 3.49 | 6.04 | 7.85  | 8.07  | 0.27  | 6.92  | 10.63 | 5.12 |
|                                                     | RMSE | 6.71  | 0.38 | 10.18 | 16.91 | 11.37 | 27.40 | 4.61 | 7.19 | 10.03 | 11.84 | 0.36  | 10.64 | 16.14 | 7.08 |
| <b>Molecular Polarizability</b>                     | AUE  | 4.28  | 0.15 | 7.37  | 17.14 | 5.70  | 22.92 | 2.57 | 3.51 | 5.39  | 9.59  | 0.13  | 6.72  | 13.69 | 4.85 |
|                                                     | APE  | 4.94  | 0.57 | 10.25 | 16.73 | 4.08  | 10.38 | 3.48 | 2.44 | 2.38  | 9.21  | 0.52  | 11.96 | 17.51 | 4.72 |
| <b>MPAD</b>                                         | APE  | 11.22 | 2.48 | 19.05 | 22.96 | 9.24  | 16.59 | 7.78 | 5.58 | 4.99  | 16.42 | 2.34  | 25.82 | 29.86 | 9.53 |
