# Supplementary material
Source: PubMed Central journal article supplement (PMC7197406)
Supplement: NIHMS1582036-supplement-S8.pdf [file NIHMS1582036-supplement-S8.pdf]

**Table S7. Summary of four D-series dipole-interaction polarizable models in anisotropic polarizability calculations.**

| D-Series Models          |      | Set1  | Set2  | Set3  | Set4  | Set5  | Set6  | Set7  | Set8  | Set9  | Set10 | Set11 | Set12 | Set13 | All   |
|--------------------------|------|-------|-------|-------|-------|-------|-------|-------|-------|-------|-------|-------|-------|-------|-------|
| #Data                    |      | 595   | 665   | 107   | 38    | 444   | 28    | 85    | 606   | 105   | 1252  | 799   | 57    | 61    | 4842  |
| <b>Applequist</b>        |      |       |       |       |       |       |       |       |       |       |       |       |       |       |       |
| Diagonal Elements        | AUE  | 12.18 | 6.71  | 23.88 | 27.16 | 12.09 | 14.68 | 12.19 | 9.10  | 14.45 | 14.48 | 6.44  | 25.04 | 22.65 | 11.41 |
|                          | RMSE | 15.54 | 7.53  | 28.52 | 29.70 | 13.56 | 17.04 | 15.03 | 10.32 | 16.17 | 16.79 | 7.25  | 31.10 | 24.23 | 13.27 |
|                          | APE  | 15.01 | 36.26 | 33.89 | 26.63 | 10.96 | 8.35  | 17.67 | 6.37  | 6.09  | 16.26 | 35.23 | 50.05 | 32.01 | 21.08 |
| All elements             | AUE  | 7.18  | 4.77  | 15.24 | 15.98 | 8.37  | 9.49  | 8.00  | 6.35  | 9.64  | 8.71  | 4.66  | 15.17 | 12.49 | 7.32  |
|                          | RMSE | 11.52 | 6.29  | 21.42 | 21.61 | 10.76 | 12.76 | 11.26 | 8.05  | 12.39 | 12.47 | 6.14  | 23.46 | 17.53 | 10.19 |
| Molecular Polarizability | AUE  | 7.68  | 4.15  | 18.21 | 17.92 | 7.15  | 6.88  | 9.25  | 6.17  | 10.28 | 8.98  | 4.12  | 17.66 | 14.98 | 7.31  |
|                          | APE  | 8.72  | 19.85 | 27.52 | 17.06 | 6.52  | 3.16  | 12.73 | 4.34  | 4.39  | 9.44  | 20.01 | 40.36 | 20.36 | 12.49 |
| MPAD                     | APE  | 18.32 | 41.56 | 42.43 | 27.94 | 11.75 | 7.78  | 21.44 | 7.32  | 6.93  | 18.20 | 40.45 | 74.08 | 33.93 | 24.35 |
| <b>Thole Exponential</b> |      |       |       |       |       |       |       |       |       |       |       |       |       |       |       |
| Diagonal                 | AUE  | 3.18  | 1.34  | 10.20 | 20.38 | 4.84  | 11.75 | 2.77  | 3.70  | 4.38  | 7.41  | 1.24  | 10.24 | 17.79 | 4.54  |
|                          | RMSE | 3.93  | 1.55  | 10.63 | 21.45 | 5.45  | 14.74 | 3.08  | 4.08  | 4.81  | 9.35  | 1.47  | 10.81 | 19.03 | 5.38  |
|                          | APE  | 3.94  | 7.91  | 14.97 | 20.21 | 3.64  | 4.72  | 4.20  | 2.57  | 1.84  | 6.51  | 7.57  | 19.81 | 24.44 | 6.33  |
| All Elements             | AUE  | 1.85  | 0.93  | 5.61  | 11.12 | 3.12  | 7.37  | 1.75  | 2.57  | 3.00  | 4.26  | 0.88  | 5.46  | 9.31  | 2.74  |
|                          | RMSE | 2.90  | 1.27  | 7.62  | 15.29 | 4.14  | 10.97 | 2.36  | 3.25  | 3.77  | 6.80  | 1.22  | 7.71  | 13.52 | 4.01  |
| Molecular Polarizability | AUE  | 1.79  | 0.40  | 7.07  | 15.27 | 3.43  | 10.88 | 1.74  | 2.34  | 2.95  | 5.95  | 0.33  | 6.95  | 12.15 | 3.14  |
|                          | APE  | 2.04  | 1.74  | 10.20 | 15.25 | 2.54  | 4.95  | 2.62  | 1.59  | 1.24  | 5.38  | 1.65  | 12.84 | 16.07 | 3.38  |
| MPAD                     | APE  | 4.87  | 8.76  | 15.21 | 21.48 | 4.11  | 6.73  | 4.63  | 2.83  | 2.03  | 8.93  | 8.47  | 20.03 | 25.66 | 7.47  |
| <b>Thole Linear</b>      |      |       |       |       |       |       |       |       |       |       |       |       |       |       |       |
| Diagonal Elements        | AUE  | 3.07  | 1.21  | 11.54 | 19.84 | 5.25  | 11.53 | 3.38  | 5.02  | 6.90  | 7.45  | 1.16  | 10.96 | 18.04 | 4.81  |
|                          | RMSE | 3.77  | 1.31  | 11.94 | 20.90 | 5.83  | 13.93 | 3.70  | 5.56  | 7.89  | 9.29  | 1.25  | 11.42 | 19.23 | 5.61  |
|                          | APE  | 3.88  | 6.13  | 17.17 | 19.56 | 4.05  | 4.78  | 4.93  | 3.58  | 2.96  | 6.67  | 6.00  | 21.43 | 25.05 | 6.13  |
| All Elements             | AUE  | 1.82  | 0.80  | 6.31  | 10.95 | 3.38  | 7.17  | 2.07  | 3.61  | 4.72  | 4.37  | 0.78  | 5.86  | 9.48  | 2.95  |
|                          | RMSE | 2.81  | 1.03  | 8.55  | 14.94 | 4.46  | 10.43 | 2.76  | 4.47  | 6.12  | 6.82  | 0.99  | 8.17  | 13.67 | 4.20  |
| Molecular Polarizability | AUE  | 1.74  | 0.60  | 8.13  | 14.77 | 3.66  | 9.69  | 2.37  | 3.64  | 4.50  | 6.05  | 0.58  | 7.45  | 12.33 | 3.48  |
|                          | APE  | 2.11  | 2.25  | 11.94 | 14.71 | 2.79  | 4.36  | 3.42  | 2.64  | 1.98  | 5.61  | 2.30  | 13.90 | 16.61 | 3.86  |
| MPAD                     | APE  | 4.81  | 6.60  | 17.39 | 20.83 | 4.51  | 6.34  | 5.42  | 4.02  | 3.45  | 9.10  | 6.47  | 21.32 | 26.16 | 7.18  |
| <b>Thole Amoeba</b>      |      |       |       |       |       |       |       |       |       |       |       |       |       |       |       |
| Diagonal Elements        | AUE  | 3.33  | 1.79  | 12.07 | 20.31 | 5.40  | 13.77 | 4.00  | 4.50  | 5.84  | 7.92  | 1.65  | 11.23 | 18.77 | 5.10  |
|                          | RMSE | 4.12  | 2.11  | 12.51 | 21.42 | 6.01  | 16.75 | 4.33  | 4.90  | 6.60  | 9.91  | 1.97  | 11.68 | 20.02 | 6.00  |
|                          | APE  | 4.14  | 7.82  | 18.23 | 19.78 | 4.27  | 5.64  | 5.90  | 3.21  | 2.54  | 6.93  | 7.64  | 22.13 | 25.93 | 6.77  |
| All Elements             | AUE  | 1.95  | 1.15  | 6.61  | 11.21 | 3.55  | 8.37  | 2.43  | 3.35  | 4.16  | 4.60  | 1.09  | 5.99  | 9.83  | 3.12  |
|                          | RMSE | 3.05  | 1.61  | 8.96  | 15.31 | 4.68  | 12.36 | 3.20  | 4.07  | 5.29  | 7.24  | 1.51  | 8.35  | 14.22 | 4.49  |
| Molecular Polarizability | AUE  | 2.07  | 1.39  | 8.30  | 15.27 | 3.67  | 12.53 | 2.72  | 2.98  | 3.25  | 6.55  | 1.32  | 7.46  | 12.86 | 3.81  |
|                          | APE  | 2.39  | 5.76  | 12.28 | 15.02 | 2.86  | 5.68  | 3.95  | 2.11  | 1.40  | 5.94  | 5.79  | 13.98 | 17.23 | 5.00  |
| MPAD                     | APE  | 5.15  | 9.86  | 18.31 | 21.14 | 4.74  | 7.63  | 6.36  | 3.51  | 2.86  | 9.53  | 9.66  | 21.82 | 27.13 | 8.31  |
